# Supplementary material for: Genomic Analysis of Influenza A and B Viruses Carrying Baloxavir Resistance-Associated Substitutions Serially Passaged in Human Epithelial Cells
Source: MDPI journal article supplement (doi:10.3390/v15122446), 2023-12-16
Supplement: s1 [file s1]

**Table S1: Substitutions that arose over 5% frequency after each passage**

| Protein | Passage | H1N1             |              |              |              |
|---------|---------|------------------|--------------|--------------|--------------|
|         |         | WT               | I38L         | I38T         | E199D        |
| PB2     | 1       | N71I             | V734E        | <b>K738N</b> | <b>K738N</b> |
|         |         | <b>K738N*</b>    | <b>K738N</b> |              |              |
|         | 2       | <b>K738N</b>     | N/A          | <b>K738N</b> | <b>K738N</b> |
|         | 3       | N/A <sup>†</sup> | N/A          | N/A          | K738N        |
| PB1     | 1       | N/A              | N/A          | N/A          | L753I        |
|         | 2       | N/A              | N/A          | N/A          | N/A          |
|         | 3       | N/A              | N/A          | N/A          | N/A          |
| PA      | 1       | N/A              | D394N        | N/A          | E26K         |
|         | 2       | N/A              | D394N        | N/A          | N/A          |
|         | 3       | I38L             | D394N        | N/A          | N/A          |
| HA      | 1       | N/A              | N/A          | N/A          | HA2 S215A    |
|         | 2       | N/A              | N/A          | N/A          | N/A          |
|         | 3       | N/A              | N/A          | N/A          | N/A          |
| HA2     | 1       | N/A              | N/A          | N/A          | N/A          |
|         | 2       | N/A              | N/A          | N/A          | N/A          |
|         | 3       | N/A              | N/A          | N/A          | N/A          |
| NA      | 1       | N/A              | N/A          | N/A          | N/A          |
|         | 2       | N/A              | N/A          | N/A          | N/A          |
|         | 3       | N/A              | N/A          | N/A          | N/A          |
| NP      | 1       | N/A              | N/A          | N/A          | N/A          |
|         | 2       | N/A              | N/A          | N/A          | N/A          |
|         | 3       | N/A              | N/A          | N/A          | N/A          |
| M1      | 1       | N/A              | N/A          | N/A          | N/A          |
|         | 2       | N/A              | N/A          | N/A          | N/A          |
|         | 3       | N/A              | N/A          | N/A          | N/A          |
| M2      | 1       | N/A              | N/A          | N/A          | N/A          |
|         | 2       | N/A              | N/A          | N/A          | N/A          |
|         | 3       | N/A              | N/A          | N/A          | N/A          |
| NS      | 1       | N/A              | N/A          | N/A          | N/A          |
|         | 2       | N/A              | N/A          | N/A          | N/A          |
|         | 3       | N/A              | N/A          | N/A          | N/A          |

\*Bolted subsitutions indicate common substitutions between WT and MUT virus

<sup>†</sup>N/A: Not applicable; No substitutions were observed in the viral protein after passage

**Substitutions that arose over 5% frequency after each passage**

| Protein | Passage | H3N2  |            |
|---------|---------|-------|------------|
|         |         | WT    | I38T       |
|         | 1       | R213G | T21K       |
|         |         | D309G | H27N       |
|         |         | D506G | I30K       |
|         |         | A569T | G37E       |
|         |         | Y592N | Y55C       |
|         |         | L733S | D60H       |
|         |         |       | E65K       |
|         |         |       | E69Stop    |
|         |         |       | R70K       |
|         |         |       | E72K       |
|         |         |       | Q73K       |
|         |         |       | G74E       |
|         |         |       | G75K       |
|         |         |       | S79N/R     |
|         |         |       | Y111N/Stop |
|         |         |       | P112T/Q    |
|         |         |       | D120E      |
|         |         |       | E171K      |
|         |         |       | L177G      |
|         |         |       | E191K      |
|         |         |       | T215K      |
|         |         |       | L232F      |
|         |         |       | Q236H      |
|         |         |       | R299Stop   |
|         |         |       | D309N      |
|         |         |       | R318K      |
|         |         |       | F325I      |
|         |         |       | S336A      |
|         |         |       | V338I      |
|         |         |       | E343K      |
|         |         |       | L352S      |
|         |         |       | I354K      |
|         |         |       | E358Stop   |
|         |         |       | G359V      |
|         |         |       | G367R/E    |
|         |         |       | G388E      |
|         |         |       | I411L      |
|         |         |       | K412T      |
|         |         |       | A413T/G    |
|         |         |       | G459E      |
|         |         |       | M483L      |
|         |         |       | L502F      |
|         |         |       | D506Y      |
|         |         |       | N510I      |

|     |   |                  |            |
|-----|---|------------------|------------|
| PB2 |   |                  | L512Stop   |
|     |   |                  | S519R      |
|     |   |                  | E520K      |
|     |   |                  | N548K      |
|     |   |                  | T549I      |
|     |   |                  | Y550D      |
|     |   |                  | W552R      |
|     |   |                  | I553F      |
|     |   |                  | Q563K      |
|     |   |                  | W564L      |
|     |   |                  | Y572Stop   |
|     |   |                  | E576K      |
|     |   |                  | M645I      |
|     |   |                  | R646K      |
|     |   |                  | R664K      |
|     |   |                  | T666K      |
|     |   |                  | G669R/E    |
|     |   |                  | P679Q      |
|     |   |                  | E712K      |
|     |   |                  | A717T/E    |
|     |   |                  | L725I      |
|     |   |                  | I726F/S    |
|     |   |                  | Q728H      |
|     |   |                  | G729V      |
|     |   |                  | D730E/V    |
|     |   |                  | M735I/L    |
|     |   |                  | K736N/Stop |
|     |   |                  | R737L      |
|     |   |                  | L738N      |
|     |   |                  | D746H      |
|     | 2 | N/A <sup>†</sup> | L20I/Q     |
|     |   |                  | T21K       |
|     |   |                  | T23P       |
|     |   |                  | D26N       |
|     |   |                  | H27N       |
|     |   |                  | I30K       |
|     |   |                  | G74E       |
|     |   |                  | G75K       |
|     |   |                  | P169S      |
|     |   |                  | E188K      |
|     |   |                  | E191K      |
|     |   |                  | E192K      |
|     |   |                  | P219Q      |
|     |   |                  | V267E      |
|     |   |                  | R268K      |
|     |   |                  | E305K      |
|     |   |                  | Q306K      |

|  |   |       |            |
|--|---|-------|------------|
|  |   |       | T333K      |
|  |   |       | E342K      |
|  |   |       | E343K      |
|  |   |       | I354K      |
|  |   |       | T666K      |
|  |   |       | L675Stop   |
|  |   |       | N723I      |
|  |   |       | Q728K      |
|  |   |       | D730E/V    |
|  |   |       | V731G      |
|  |   |       | V734E      |
|  |   |       | M735I      |
|  |   |       | R737P/L    |
|  |   |       | L738N      |
|  | 3 | N/A   | E305G/Stop |
|  |   |       | G367R      |
|  |   |       | Q433H      |
|  |   |       | Y572F      |
|  |   |       | Q728K      |
|  |   | C770R | A140S      |
|  |   |       | A14E       |
|  |   |       | A349V      |
|  |   |       | A453E      |
|  |   |       | E109D      |
|  |   |       | E178K      |
|  |   |       | E256K      |
|  |   |       | E390K      |
|  |   |       | E60K       |
|  |   |       | F185V/C/L  |
|  |   |       | F412L      |
|  |   |       | G234D      |
|  |   |       | G513V/Stop |
|  |   |       | G622E      |
|  |   |       | H634Q      |
|  |   |       | I18K       |
|  |   |       | I248N      |
|  |   |       | I392K      |
|  |   |       | I674F      |
|  |   |       | I750F      |
|  |   |       | K237N      |
|  |   |       | K578Stop   |
|  |   |       | L163Q      |
|  |   |       | L236I/Stop |
|  |   |       | L550M      |
|  |   |       | L675R      |
|  |   |       | M246I      |
|  |   |       | M317L      |

|     |   |  |            |
|-----|---|--|------------|
| PB1 | 1 |  | M409I      |
|     |   |  | M546K      |
|     |   |  | N134K      |
|     |   |  | N16K       |
|     |   |  | N425I      |
|     |   |  | N58K       |
|     |   |  | N641K      |
|     |   |  | N671D      |
|     |   |  | N676K      |
|     |   |  | P394H      |
|     |   |  | P454T/Q    |
|     |   |  | P596Q      |
|     |   |  | Q186K/H    |
|     |   |  | Q247K      |
|     |   |  | Q268L      |
|     |   |  | Q313K      |
|     |   |  | Q367K      |
|     |   |  | Q460K      |
|     |   |  | Q48L       |
|     |   |  | R135K/Stop |
|     |   |  | R187K      |
|     |   |  | R233K      |
|     |   |  | S173Stop   |
|     |   |  | S19R       |
|     |   |  | S633R      |
|     |   |  | T132A      |
|     |   |  | T20K       |
|     |   |  | T307A      |
|     |   |  | T366K      |
|     |   |  | T36A       |
|     |   |  | T432N      |
|     |   |  | T434K      |
|     |   |  | T543P      |
|     |   |  | T59K       |
|     |   |  | T677K      |
|     |   |  | V421L      |
|     |   |  | V640E      |
|     |   |  | W437Stop   |
|     |   |  | Y253N      |
|     |   |  | Y355C      |
|     |   |  | Y555Stop   |
|     |   |  | E277K      |
|     |   |  | E311K      |
|     |   |  | E383K      |
|     |   |  | E636K      |
|     |   |  | E78K       |
|     |   |  | F185L      |

|  |   |          |            |
|--|---|----------|------------|
|  | 2 | N/A      | I181K      |
|  |   |          | I219K      |
|  |   |          | I342K      |
|  |   |          | I552N      |
|  |   |          | L218I/Q    |
|  |   |          | L271I      |
|  |   |          | L576Q      |
|  |   |          | N276K      |
|  |   |          | N312K      |
|  |   |          | N346K      |
|  |   |          | N536K      |
|  |   |          | P369H      |
|  |   |          | P596Q      |
|  |   |          | Q313K      |
|  |   |          | Q549K      |
|  |   |          | Q567K      |
|  |   |          | R187K      |
|  |   |          | R287G      |
|  |   |          | S384T/Stop |
|  |   |          | T110K      |
|  |   |          | T20K       |
|  |   |          | T21K       |
|  |   |          | T385K      |
|  |   |          | T677K      |
|  | 3 | P369A    | E256K      |
|  |   | S704Stop | G594R      |
|  |   | Y436Stop | I389T      |
|  |   |          | L258I      |
|  |   |          | S261R      |
|  |   | L42W     | C7S        |
|  |   | E43Q     | C10S       |
|  |   | D108N    | N14K       |
|  |   | K134E    | E15K       |
|  |   | P238L    | G20E       |
|  |   | G372E    | N25K       |
|  |   | E430V    | Q27K       |
|  |   | I486R    | Stop49R    |
|  |   | Y722H    | T50K       |
|  |   |          | V65D       |
|  |   |          | Q77K       |
|  |   |          | N78K       |
|  |   |          | S84R       |
|  |   |          | Q106K      |
|  |   |          | Stop132K   |
|  |   |          | E135K      |
|  |   |          | G147E      |
|  |   |          | H171Q      |

PA

1

|  |          |
|--|----------|
|  | T173K    |
|  | R174K    |
|  | P180T    |
|  | R188Q    |
|  | E215Q    |
|  | P249L    |
|  | F253L    |
|  | D256V    |
|  | N261I/K  |
|  | Q262K    |
|  | N306T    |
|  | R320Q    |
|  | G322V    |
|  | F325Y/L  |
|  | M331I    |
|  | R337K    |
|  | A339S    |
|  | D350N    |
|  | W365Stop |
|  | H380Q    |
|  | E384Stop |
|  | R390Q    |
|  | L415M    |
|  | E435V    |
|  | H460N    |
|  | N484K    |
|  | Stop485K |
|  | A489E    |
|  | I494L    |
|  | E524K    |
|  | Stop526L |
|  | A527D    |
|  | T543N    |
|  | Y554Stop |
|  | V557L    |
|  | N568K    |
|  | E569K    |
|  | Stop590W |
|  | E598K    |
|  | Q602K    |
|  | R610K    |
|  | H614N    |
|  | C662F    |
|  | S676C    |
|  | L692P    |
|  | A695S    |
|  | L703P    |

|            |   |     |          |        |
|------------|---|-----|----------|--------|
|            |   |     | Y705Stop |        |
|            |   |     | F717L    |        |
|            | 2 | N/A | C7S      |        |
|            |   |     | A20E     |        |
|            |   |     | M21K/I   |        |
|            |   |     | D27N     |        |
|            |   |     | N33K     |        |
|            |   |     | I178K    |        |
|            |   |     | R179K    |        |
|            |   |     | Q180K    |        |
|            |   |     | E181K    |        |
|            |   |     | E195K    |        |
|            |   |     | I268N    |        |
|            |   |     | Y277F    |        |
|            |   |     | G372E    |        |
|            |   |     | E377K    |        |
|            |   |     | L500F    |        |
|            |   |     | Y501F    |        |
|            |   |     | L550I/Q  |        |
|            |   |     | T567K    |        |
|            |   |     | S571Stop |        |
|            |   |     | E604K    |        |
|            |   |     | Q654K    |        |
|            |   |     | V669F    |        |
|            |   |     | L701F    |        |
|            | 3 | N/A | C7S      |        |
|            |   | 1   | N/A      | D7E    |
|            |   |     |          | H18N   |
|            |   |     |          | N22D   |
|            |   |     |          | V26E   |
|            |   |     |          | T28S/K |
|            |   |     |          | A106V  |
| F120Y/L    |   |     |          |        |
| N121K      |   |     |          |        |
| G129Stop   |   |     |          |        |
| T131S      |   |     |          |        |
| A138S      |   |     |          |        |
| H156Q      |   |     |          |        |
| L157I/Stop |   |     |          |        |
| L164Stop   |   |     |          |        |
| M168K/I    |   |     |          |        |
| P169T/Q    |   |     |          |        |
| N170K      |   |     |          |        |
| N171Y/K    |   |     |          |        |
| E172K      |   |     |          |        |
| H183Q      |   |     |          |        |
| G200V      |   |     |          |        |



|     |       |          |         |
|-----|-------|----------|---------|
| HA1 |       |          | T206N   |
|     |       |          | Q211L   |
|     |       |          | P215T   |
|     |       |          | N216D   |
|     |       |          | I217T   |
|     |       |          | Q327K/L |
|     |       |          | A334E   |
|     |       |          | A336E   |
|     |       |          | G337C   |
|     |       |          | G342R   |
|     |       |          | W343L   |
|     | 2     | T135R    | G5R/E   |
|     |       | P254H    | D7E     |
|     |       | R261Stop | P169T/Q |
|     |       |          | N170K   |
|     |       |          | N171K   |
|     |       |          | E172K   |
|     |       |          | T206N   |
|     |       |          | R208K   |
|     |       |          | I236K   |
|     |       |          | Q295E   |
|     | Q327K |          |         |
| 3   | N/A   | C100R    |         |
|     | 1     | N/A      | M3I     |
|     |       |          | V4L     |
|     |       |          | G6C     |
|     |       |          | W7R     |
|     |       |          | Q20K    |
|     |       |          | D23H    |
|     |       |          | N32K    |
|     |       |          | Q33K    |
|     |       |          | N46H    |
|     |       |          | F49I    |
|     |       |          | E53D    |
|     |       |          | K54I    |
|     |       |          | E55K/V  |
|     |       |          | E60V    |
|     |       |          | G61V    |
|     |       |          | V70D    |
|     |       |          | T93K    |
|     |       |          | E114K   |
|     |       |          | F124L   |
|     |       |          | I138N   |
|     |       |          | R139K   |
|     |       |          | N140K   |
|     |       |          | H145N   |
|     |       |          | V147I   |

|     |     |  |            |
|-----|-----|--|------------|
| HA2 |     |  | Q158K      |
|     |     |  | I159N      |
|     |     |  | S176F      |
| 2   | N/A |  | C185F      |
|     |     |  | V186F      |
|     |     |  | L188F      |
| 3   | N/A |  | L189F      |
|     |     |  | N31K       |
|     |     |  | Q32K       |
| 1   | N/A |  | G42E       |
|     |     |  | E46K       |
|     |     |  | R61K       |
|     |     |  | H91N/Q     |
|     |     |  | T92K       |
|     |     |  | R106K      |
|     |     |  | T107K      |
|     |     |  | E113K      |
|     |     |  | F123L      |
|     |     |  | R138K      |
|     |     |  | V146I      |
|     |     |  | I158N      |
|     |     |  | L182F      |
|     |     |  | C184F      |
|     |     |  | V185F      |
|     |     |  | A186S/G/V  |
|     |     |  | L187F      |
|     |     |  | K27R       |
|     |     |  | Y71H       |
|     |     |  | A131S      |
|     |     |  | A237E      |
|     |     |  | C333Stop   |
|     |     |  | D112N/E    |
|     |     |  | D72E       |
|     |     |  | E114K/Stop |
|     |     |  | E115K/Stop |
|     |     |  | E11D       |
|     |     |  | E14K/D     |
|     |     |  | E294K      |
|     |     |  | E454K      |
|     |     |  | E455K      |
|     |     |  | E64K       |
|     |     |  | E81K       |
|     |     |  | G356E      |
|     |     |  | G5S        |
|     |     |  | I116K      |
|     |     |  | I257L      |
|     |     |  | I347N      |

|    |   |       |            |
|----|---|-------|------------|
| NP |   |       | I63K       |
|    |   |       | I96M       |
|    | 2 |       | K198R/N    |
|    |   |       | L143F      |
|    |   |       | M137I      |
|    |   |       | M13I       |
|    |   |       | N124K      |
|    |   |       | P283T      |
|    |   |       | P419Q      |
|    |   |       | Q235K      |
|    |   |       | Q308K      |
|    |   |       | R117T      |
|    |   |       | R31K       |
|    |   |       | S310G      |
|    |   |       | T62K       |
|    |   |       | Y111N/Stop |
|    |   |       | Y289N      |
|    |   |       | Y52N       |
|    |   | A251T | M13I       |
|    |   | V280A | E14K/D     |
|    |   | N417D | G102V      |
|    |   |       | Y111F      |
|    |   |       | D112N/E    |
|    |   |       | E113K      |
|    |   |       | I116K      |
|    |   |       | R117T      |
|    |   |       | Y120R      |
|    |   |       | D128G      |
|    |   |       | R195K      |
|    |   |       | T215K      |
|    |   |       | R216K      |
|    |   |       | Q235K      |
|    |   |       | E244K      |
|    |   |       | G295E      |
|    |   |       | H324Q      |
|    |   |       | P419Q      |
|    |   |       | E454K      |
|    |   |       | E455K      |
|    | 3 | N/A   | Y496H      |
|    |   |       | S14P       |
|    |   |       | L15H       |
|    |   |       | V33E       |
|    |   |       | P46Q       |
|    |   |       | Q49K       |
|    |   |       | E54K       |
|    |   |       | P55T/Q     |
|    |   |       | T56K       |

|    |   |          |         |
|----|---|----------|---------|
| NA | 1 | N/A      | I58K    |
|    |   |          | R60K    |
|    |   |          | E74K    |
|    |   |          | H168Y   |
|    |   |          | G196W   |
|    |   |          | A201S/E |
|    |   |          | N208Y/I |
|    |   |          | R210S   |
|    |   |          | L211H   |
|    |   |          | E221K   |
|    |   |          | S266C   |
|    |   |          | V303E   |
|    |   |          | D304N/E |
|    |   |          | I305K   |
|    |   |          | R327T   |
|    |   |          | C337S   |
|    |   |          | E344K   |
|    |   |          | G357R/E |
|    |   |          | E375K   |
|    |   |          | F377I   |
|    |   |          | Q395L   |
|    |   |          | R430K   |
|    |   |          | V445L   |
|    |   |          | C447F   |
|    |   |          | G448C   |
|    | 2 | N2I      | S18F    |
|    |   | K80E     | M24I    |
|    |   | W87R     | Q25K    |
|    |   | E343Stop | S101F   |
|    |   | S367N    | T138K   |
|    |   |          | L140I/Q |
|    |   |          | N141K   |
|    |   |          | H168Y   |
|    |   |          | E221K   |
|    |   |          | C318G   |
|    |   |          | R327K   |
|    |   |          | E344K   |
|    |   |          | G363E   |
|    |   |          | R364K   |
|    |   |          | E375K   |
|    |   |          | I392K   |
|    |   |          | S411F   |
|    |   |          | V412F   |
|    |   |          | R430K   |
|    |   |          | E433K   |
|    |   |          | V445L   |
|    |   |          | C447F   |

|           |          |         |            |
|-----------|----------|---------|------------|
|           | <b>3</b> | N/A     | E476K/A/D  |
|           |          |         | L321I      |
|           |          |         | S332P      |
|           |          |         | R430G      |
|           |          |         | G461E      |
| <b>M1</b> | <b>1</b> | N/A     | E23G       |
|           |          |         | E44K       |
|           |          |         | T48K       |
|           |          |         | K57T       |
|           |          |         | I131K      |
|           |          |         | Y132N/Stop |
|           |          |         | R210M      |
|           |          |         | Q238K      |
|           |          |         | Stop253S   |
|           |          |         | R259H      |
|           |          |         | Y261H      |
|           |          |         | W263L      |
|           |          |         | A266E      |
|           |          |         | L267I      |
|           |          |         | Q285H      |
|           | <b>2</b> | E6K     | P50Q       |
|           |          | E152D   | V63C       |
|           |          | M203K/L | Y132N/Stop |
|           |          | D268V   | V138E      |
|           |          | S275C   | N177K      |
|           |          |         | R178K      |
|           |          |         | E201D      |
|           |          |         | Stop289K   |
|           |          |         | C313R      |
|           | <b>3</b> | N/A     |            |
| <b>M2</b> | <b>1</b> | E14V    | D24H       |
|           |          | L46V    | A30T       |
|           |          |         | G34W       |
|           |          |         | H37N/Q     |
|           |          |         | K56I       |
|           | <b>2</b> | N/A     |            |
|           | <b>3</b> | N/A     |            |
| <b>NS</b> | <b>1</b> | N/A     | Q21K       |
|           |          |         | D44G       |
|           |          |         | T48S       |
|           |          |         | E56K       |
|           |          |         | T57A       |
|           |          |         | G58C       |
|           |          |         | L80F       |
|           |          |         | S97Stop    |
|           |          |         | N102Y      |
|           |          |         | K110Stop   |
|           |          |         |            |

|  |          |     |         |
|--|----------|-----|---------|
|  |          |     | N111Y   |
|  |          |     | Q113L/H |
|  |          |     | W117C   |
|  |          |     | S119C   |
|  |          |     | N123Y/I |
|  | <b>2</b> | N/A | Q21K    |
|  |          |     | V23I/E  |
|  |          |     | D24N    |
|  |          |     | L77I/H  |
|  |          |     | I90K    |
|  |          |     | N101I   |
|  |          |     | E112D   |
|  |          |     | D173N   |
|  | <b>3</b> | N/A | V111A   |

\*Bolted substitutions indicate common substitutions between WT and mutant virus

†N/A: Not applicable; No substitutions were observed in the viral protein after passage

Substitutions that arose over 5% frequency after each passage

| Protein | Passage | IBV               |                   |
|---------|---------|-------------------|-------------------|
|         |         | <b>WT</b>         | <b>I38T</b>       |
|         |         | V21E              | L22Stop           |
|         |         | <b>L22Stop*</b>   | <b>Q24K</b>       |
|         |         | <b>Q24K</b>       | <b>T25K</b>       |
|         |         | <b>T25K</b>       | Y30Stop           |
|         |         | D28N/E            | <b>I32K</b>       |
|         |         | Q29K              | <b>I77K</b>       |
|         |         | Y30N/Stop         | <b>Q78K</b>       |
|         |         | N31K              | <b>T81K</b>       |
|         |         | <b>I32K</b>       | <b>E155K</b>      |
|         |         | I33K              | <b>E190K</b>      |
|         |         | R34K              | <b>I200K</b>      |
|         |         | R40K              | S276Stop          |
|         |         | L47Stop           | L332Q             |
|         |         | M49I              | <b>Q354K</b>      |
|         |         | L72F              | <b>I388K</b>      |
|         |         | G76E              | <b>M396K/I</b>    |
|         |         | <b>I77K</b>       | <b>L399F/Stop</b> |
|         |         | <b>Q78K</b>       | <b>R443K/I</b>    |
|         |         | L79I/H            | <b>S490C/I</b>    |
|         |         | <b>T81K</b>       | T500K             |
|         |         | <b>E155K</b>      | L505Stop          |
|         |         | <b>E190K</b>      | <b>I506K</b>      |
|         |         | R192K             | <b>I616K</b>      |
|         |         | E193K             | <b>E666K</b>      |
|         |         | <b>I200K</b>      | <b>E716K</b>      |
|         |         | F230Y/L           | G733E             |
|         |         | I231K             |                   |
|         |         | E232K             |                   |
|         |         | R243K             |                   |
|         |         | S276T/Stop        |                   |
|         |         | E284K             |                   |
|         |         | R324T/I           |                   |
|         |         | Q325K             |                   |
|         |         | R334K             |                   |
|         |         | F340Y/L           |                   |
|         |         | <b>Q354K</b>      |                   |
|         |         | I375K             |                   |
|         |         | L376I/Stop        |                   |
|         |         | R382K             |                   |
|         |         | L387Q             |                   |
|         |         | <b>I388K</b>      |                   |
|         |         | D395E             |                   |
|         |         | <b>M396K/I</b>    |                   |
|         |         | <b>L399F/Stop</b> |                   |
|         |         | I400K             |                   |

|                  |                |
|------------------|----------------|
| L430Stop         |                |
| Q437K            |                |
| <b>R443K/I</b>   |                |
| M469I            |                |
| V480E            |                |
| V481I/E          |                |
| T482K            |                |
| <b>S490C/I</b>   |                |
| S491F            |                |
| S504N/R          |                |
| L505I/Stop       |                |
| <b>I506K</b>     |                |
| G541E            |                |
| T542K            |                |
| T543N            |                |
| E545K            |                |
| L546P            |                |
| Q548K            |                |
| Q552E            |                |
| W553C            |                |
| G568Stop         |                |
| E570K            |                |
| I584K            |                |
| A597S            |                |
| Q603K            |                |
| <b>I616K</b>     |                |
| G646R/E          |                |
| E647K            |                |
| T665K            |                |
| <b>E666K</b>     |                |
| <b>E716K</b>     |                |
| L720I/Q          |                |
| V738I            |                |
| <b>L22M/Stop</b> | <b>A597S</b>   |
| <b>Q24K</b>      | <b>D395E</b>   |
| <b>T25K</b>      | <b>E155K</b>   |
| <b>Y30N/Stop</b> | <b>E190K</b>   |
| <b>N31K</b>      | <b>E193K</b>   |
| <b>I32K</b>      | <b>E232K</b>   |
| <b>I33K</b>      | <b>E284K</b>   |
| <b>R34K</b>      | <b>E647K</b>   |
| G76E             | <b>E666K</b>   |
| <b>I77K</b>      | <b>E716K</b>   |
| <b>Q78K</b>      | <b>F230Y/L</b> |
| <b>L79I/H</b>    | <b>F340L</b>   |
| <b>T81K</b>      | F489L          |
| <b>E155K</b>     | <b>F615L</b>   |
| <b>E190K</b>     | G646R/E        |
| <b>R192K</b>     | <b>G733E</b>   |



PB2

2

|            |            |
|------------|------------|
| E193K      | I200K      |
| M199I      | I231K      |
| I200K      | I32K       |
| F230Y/L    | I33K       |
| I231K      | I375K      |
| E232K      | I388K      |
| S276T/Stop | I400K      |
| V283E      | I506K      |
| E284K      | I616K      |
| L319Q      | I77K       |
| L332I/Q    | L22M/Stop  |
| R334K      | L319Q      |
| F340L      | L332I/Q    |
| Q354K      | L376I/Stop |
| I375K      | L387I/Q    |
| L376I/Stop | L399F/Stop |
| L387I/Q    | L505Stop   |
| I388K      | L79I/H     |
| D395E      | M199I      |
| M396K/I    | M396K/I    |
| L399F/Stop | N31K       |
| I400K      | Q24K       |
| Q437K      | Q354K      |
| R443K/I    | Q603K      |
| V481I/E    | Q78K       |
| T482K      | R192K      |
| S490C/I    | R334K      |
| L505Stop   | R34K       |
| I506K      | R40K       |
| T542K      | R443K/I    |
| T543N      | S276T/Stop |
| E545K      | S407F      |
| A597S      | S490C      |
| Q603K      | T25K       |
| F615L      | T482K      |
| I616K      | T542K      |
| G646E      | T665K      |
| E647K      | T81K       |
| T665K      | V481I/E    |
| E666K      | Y30N/Stop  |
| E716K      | Y772N/Stop |
| G733E      |            |
| L22Stop    | A597S      |
| Q24K       | D395E      |
| T25K       | D683E      |
| Y30N/Stop  | E155K      |
| N31K       | E190K      |
| I32K       | E232K      |
| I33K       | E284K      |

|                   |                   |
|-------------------|-------------------|
| <b>R34K</b>       | E545K             |
| R40K              | <b>E647K</b>      |
| <b>I77K</b>       | <b>E666K</b>      |
| <b>Q78K</b>       | E684K             |
| <b>L79I/H</b>     | E685K             |
| <b>T81K</b>       | <b>E716K</b>      |
| <b>E155K</b>      | <b>F230Y/L</b>    |
| <b>E190K</b>      | <b>F340L</b>      |
| R192K             | <b>F615L</b>      |
| E193K             | <b>G646R/E</b>    |
| <b>M199I</b>      | G733E             |
| <b>I200K</b>      | <b>I200K</b>      |
| <b>F230Y/L</b>    | <b>I231K</b>      |
| <b>I231K</b>      | <b>I32K</b>       |
| <b>E232K</b>      | <b>I33K</b>       |
| <b>S276T/Stop</b> | <b>I375K</b>      |
| V283E             | <b>I388K</b>      |
| <b>E284K</b>      | <b>I400K</b>      |
| L319Q/I           | I499K             |
| <b>L332I/Q</b>    | <b>I506K</b>      |
| <b>R334K</b>      | <b>I616K</b>      |
| <b>F340L</b>      | <b>I77K</b>       |
| <b>Q354K</b>      | L22M/Stop         |
| <b>I375K</b>      | <b>L332I/Q</b>    |
| <b>L376I/Stop</b> | <b>L376I/Stop</b> |
| L387I/Q           | <b>L399F/Stop</b> |
| <b>I388K</b>      | <b>L505Stop</b>   |
| <b>D395E</b>      | <b>L79I/H</b>     |
| <b>M396K/I</b>    | <b>M199I</b>      |
| <b>L399F/Stop</b> | <b>M396K/I</b>    |
| <b>I400K</b>      | <b>N31K</b>       |
| <b>R443K/I</b>    | <b>Q24K</b>       |
| <b>V481I/E</b>    | <b>Q354K</b>      |
| <b>T482K</b>      | <b>Q603K</b>      |
| F489L             | <b>Q78K</b>       |
| <b>S490C</b>      | <b>R334K</b>      |
| <b>T500K</b>      | <b>R34K</b>       |
| <b>L505Stop</b>   | <b>R443K/I</b>    |
| <b>I506K</b>      | <b>S276T/Stop</b> |
| <b>T542K</b>      | <b>S490C</b>      |
| <b>T543N</b>      | <b>T25K</b>       |
| <b>A597S</b>      | <b>T482K</b>      |
| <b>Q603K</b>      | <b>T500K</b>      |
| <b>F615L</b>      | <b>T542K</b>      |
| <b>I616K</b>      | <b>T543N</b>      |
| <b>G646R/E</b>    | <b>T665K</b>      |
| <b>E647K</b>      | <b>T81K</b>       |
| <b>T665K</b>      | <b>V481I/E</b>    |
| <b>E666K</b>      | <b>Y30N/Stop</b>  |

|  |  |              |              |
|--|--|--------------|--------------|
|  |  | <b>E716K</b> |              |
|  |  | A140P        | <b>E399K</b> |
|  |  | A259D/T      | <b>G431E</b> |
|  |  | A387E/S      | I187K        |
|  |  | A452E        | I218N        |
|  |  | A543E        | I547K        |
|  |  | A744D        | N432K        |
|  |  | C469Y        | Q548K        |
|  |  | C560F        | R196K        |
|  |  | C63Stop      | <b>R238K</b> |
|  |  | D175N/E      | <b>T39K</b>  |
|  |  | D553V        | Y217Stop     |
|  |  | D76N/E       | Y381Stop     |
|  |  | E178K/D      | Y619Stop     |
|  |  | E383K/V      |              |
|  |  | E384K        |              |
|  |  | <b>E399K</b> |              |
|  |  | E618K        |              |
|  |  | E696Stop     |              |
|  |  | E740Stop     |              |
|  |  | E748Stop     |              |
|  |  | E75K         |              |
|  |  | <b>G431E</b> |              |
|  |  | G525E        |              |
|  |  | G53E         |              |
|  |  | H38Q         |              |
|  |  | H745L        |              |
|  |  | I201K        |              |
|  |  | I357K        |              |
|  |  | K185Stop     |              |
|  |  | K188Stop     |              |
|  |  | K347N        |              |
|  |  | K360I        |              |
|  |  | K362I/Stop   |              |
|  |  | L404F        |              |
|  |  | M356I/K      |              |
|  |  | N186I        |              |
|  |  | N432H/K      |              |
|  |  | N535K        |              |
|  |  | N581K        |              |
|  |  | P138H        |              |
|  |  | Q168K        |              |
|  |  | Q367K        |              |
|  |  | Q544K        |              |
|  |  | Q548H/K      |              |
|  |  | Q686K        |              |
|  |  | R203K        |              |
|  |  | <b>R238K</b> |              |
|  |  | R316K        |              |

PB1

2

|                |                |
|----------------|----------------|
| R380S          |                |
| R555M          |                |
| R733I          |                |
| S291G          |                |
| S359N/R        |                |
| Stop753L/K     |                |
| T301R          |                |
| T358K          |                |
| T361K          |                |
| T385K          |                |
| <b>T39K</b>    |                |
| T492K          |                |
| T64K           |                |
| T667N          |                |
| T69K           |                |
| V252L          |                |
| V450F          |                |
| Y619N/Stop     |                |
| <b>H38Q</b>    | <b>A259T/D</b> |
| <b>T39K</b>    | A543E          |
| <b>E75K</b>    | <b>D616N</b>   |
| <b>D76N/E</b>  | D643N/E        |
| L143Stop       | <b>D76N/E</b>  |
| <b>T145K</b>   | E277K          |
| <b>V184I/E</b> | <b>E399K</b>   |
| <b>N186K</b>   | <b>E75K</b>    |
| <b>I187K</b>   | G431E          |
| R196K          | <b>G525E</b>   |
| <b>R203K</b>   | G53E           |
| V208E          | <b>H38Q</b>    |
| <b>I218N</b>   | <b>I187K</b>   |
| <b>L236Q</b>   | <b>I218N</b>   |
| <b>R238K</b>   | <b>I325K</b>   |
| V252L          | <b>I427N</b>   |
| <b>A259T/D</b> | <b>I528K</b>   |
| <b>R316K</b>   | <b>I529K</b>   |
| <b>R324K</b>   | <b>I644K</b>   |
| <b>I325K</b>   | L143I/Stop     |
| <b>S359N/R</b> | <b>L236Q</b>   |
| <b>T361K</b>   | L779P          |
| <b>N397K</b>   | <b>N186K</b>   |
| E398K          | <b>N397K</b>   |
| <b>E399K</b>   | <b>N432K</b>   |
| <b>I427N</b>   | N51K           |
| <b>N432K</b>   | Q104K          |
| L436Stop       | Q544K          |
| I474K          | <b>Q548K</b>   |
| E485K          | <b>Q686K</b>   |
| <b>G525E</b>   | <b>R203K</b>   |

|            |            |
|------------|------------|
| T527K      | R238K      |
| I528K      | R316K      |
| I529K      | R324K      |
| Q548K      | R722K      |
| S565Y      | S359N/R    |
| G569R/E    | T145K      |
| R571K      | T361K      |
| D616N      | T39K       |
| D643E      | T64K       |
| I644K      | V184I/E    |
| Q686K      | V252L      |
| R722K      | V450F      |
| T752K      | Y217Stop   |
| Stop753K   | Y381Stop   |
| Y619N/Stop |            |
| A259T/D    | A259T/D    |
| A447S/V    | A543E      |
| A543E      | D616N      |
| D616N      | D643N/E    |
| D643E/N    | D76N/E     |
| D76N/E/H   | E379K      |
| E379K      | E399K      |
| E399K      | E75K       |
| E75K/D     | G431E      |
| G431E      | G525E      |
| G525E      | H38Q       |
| I187K      | I187K      |
| I218N      | I218N      |
| I325K      | I325K      |
| I474K      | I528K      |
| I528K      | I529K      |
| I529K      | I644K      |
| I644K      | L143I/Stop |
| L236Q/I    | L236Q/I    |
| L436Stop   | L378Stop   |
| N186K      | L436Stop   |
| N195K      | N144K      |
| N432K      | N186K      |
| N51K       | N432K      |
| N77K       | Q544K      |
| Q544K      | Q548K      |
| Q548K      | Q686K      |
| Q686K      | R196K      |
| R196K      | R203K      |
| R203K      | R238K      |
| R238K      | R316K      |
| R324K      | R324K      |
| R571K      | R571K      |
| R705K      | R722K      |

|  |  |                   |                   |
|--|--|-------------------|-------------------|
|  |  | <b>R722K</b>      | <b>S359N/R</b>    |
|  |  | <b>S359N/R</b>    | <b>Stop753K</b>   |
|  |  | <b>Stop753K</b>   | <b>T145K</b>      |
|  |  | <b>T145K</b>      | T146K             |
|  |  | T20K              | <b>T361K</b>      |
|  |  | <b>T361K</b>      | <b>T39K</b>       |
|  |  | <b>T39K</b>       | <b>T752K</b>      |
|  |  | <b>T752K</b>      | <b>V184I/E</b>    |
|  |  | <b>V184I/E</b>    | <b>V252L</b>      |
|  |  | <b>V252L</b>      | V450F             |
|  |  | <b>Y381N/Stop</b> | <b>Y381N/Stop</b> |
|  |  | <b>Y619Stop</b>   | <b>Y619Stop</b>   |
|  |  | A306T/D           | E137K             |
|  |  | C45S              | <b>E194K</b>      |
|  |  | C603Stop          | <b>E224K</b>      |
|  |  | D109G             | E26A              |
|  |  | D261N             | E329G             |
|  |  | D670N/E           | <b>E621K</b>      |
|  |  | E193K             | <b>E65K</b>       |
|  |  | <b>E194K</b>      | <b>E70K</b>       |
|  |  | <b>E224K</b>      | G622E             |
|  |  | E23K              | <b>I375K</b>      |
|  |  | E240K             | I38T              |
|  |  | E260K             | <b>M376K/I</b>    |
|  |  | E26K              | N745K             |
|  |  | E29Stop           | Q583K             |
|  |  | E308K             | Q595K             |
|  |  | E311K             | <b>Q71K</b>       |
|  |  | E333K             | <b>R671K</b>      |
|  |  | E378K             | Stop727K          |
|  |  | E468K             | Stop742K          |
|  |  | E550K             | <b>T20K</b>       |
|  |  | <b>E621K</b>      | V625E             |
|  |  | <b>E65K</b>       | W133Stop          |
|  |  | <b>E70K</b>       | <b>Y476N/Stop</b> |
|  |  | F36I              |                   |
|  |  | G225E             |                   |
|  |  | G498C             |                   |
|  |  | G622R/E           |                   |
|  |  | G68E              |                   |
|  |  | I239K             |                   |
|  |  | <b>I375K</b>      |                   |
|  |  | I48K              |                   |
|  |  | L249Stop          |                   |
|  |  | L35I              |                   |
|  |  | L466Stop          |                   |
|  |  | L641F             |                   |
|  |  | L668I/Stop        |                   |
|  |  | <b>M376K/I</b>    |                   |

PA

2

|                |                 |
|----------------|-----------------|
| N332K          |                 |
| N395K          |                 |
| N467K          |                 |
| P322Q          |                 |
| P534T/Q        |                 |
| Q566K          |                 |
| <b>Q71K</b>    |                 |
| R241K          |                 |
| R634I          |                 |
| <b>R671K</b>   |                 |
| S299Y          |                 |
| S415N/R        |                 |
| S436N/R        |                 |
| <b>T20K</b>    |                 |
| T414K          |                 |
| V403D          |                 |
| V47E           |                 |
| W133R/Stop     |                 |
| W259C          |                 |
| Y476Stop       |                 |
| Y497F          |                 |
| Y683F          |                 |
| D670N/E        | <b>E137K</b>    |
| <b>E137K</b>   | <b>E165K</b>    |
| <b>E165K</b>   | <b>E193K</b>    |
| <b>E193K</b>   | <b>E194K</b>    |
| <b>E194K</b>   | <b>E26K</b>     |
| <b>E26K</b>    | <b>E308K</b>    |
| <b>E308K</b>   | E329G           |
| <b>E333K</b>   | <b>E333K</b>    |
| <b>E378K</b>   | <b>E378K</b>    |
| <b>E65K</b>    | E621K           |
| <b>E70K</b>    | <b>E65K</b>     |
| E710K          | <b>E70K</b>     |
| E726K          | G225E           |
| F709L          | G622E           |
| G622R/E        | <b>I375K</b>    |
| G681E          | I38T            |
| <b>I375K</b>   | <b>I48K</b>     |
| <b>I48K</b>    | <b>M376K/I</b>  |
| L249Stop       | N745K           |
| L624I/Q        | <b>P322Q</b>    |
| L641F          | <b>Q583K</b>    |
| L668I/Stop     | <b>Q595K</b>    |
| <b>M376K/I</b> | <b>Q71K</b>     |
| N19K           | <b>R241K</b>    |
| N332K          | <b>R671K</b>    |
| N395K          | <b>S415N/R</b>  |
| N444Y          | <b>Stop727K</b> |

|                   |                   |
|-------------------|-------------------|
| P254H             | Stop742K          |
| <b>P322Q</b>      | <b>T20K</b>       |
| P534T/Q           | <b>T414K</b>      |
| <b>Q583K</b>      | <b>V47E</b>       |
| <b>Q595K</b>      | V625E             |
| <b>Q71K</b>       | <b>W133Stop</b>   |
| <b>R241K</b>      | <b>Y476N/Stop</b> |
| R438K             |                   |
| R439K             |                   |
| <b>R671K</b>      |                   |
| <b>S415N/R</b>    |                   |
| <b>Stop727K</b>   |                   |
| <b>T20K</b>       |                   |
| <b>T414K</b>      |                   |
| V443F             |                   |
| <b>V47E</b>       |                   |
| V625I/E           |                   |
| <b>W133Stop</b>   |                   |
| <b>Y476N/Stop</b> |                   |
| D231E             | D670E/N           |
| D670N/E           | <b>E137K</b>      |
| <b>E137K</b>      | <b>E165K</b>      |
| <b>E165K</b>      | E176K             |
| <b>E193K</b>      | <b>E193K</b>      |
| <b>E194K</b>      | <b>E194K</b>      |
| <b>E308K</b>      | E26K              |
| E378K             | <b>E308K</b>      |
| <b>E65K</b>       | E329G             |
| <b>E70K</b>       | E468K             |
| <b>E710K</b>      | <b>E65K</b>       |
| <b>F709L</b>      | <b>E70K</b>       |
| G622R/E           | <b>E710K</b>      |
| <b>G681E</b>      | <b>F709L</b>      |
| I325K             | G622E/R           |
| I347K             | <b>G681E</b>      |
| I375K             | I38T              |
| I48K              | <b>L624I/Q</b>    |
| I723K             | <b>L641F</b>      |
| <b>L624I/Q</b>    | <b>L668I/Stop</b> |
| <b>L641F</b>      | M376I/K           |
| <b>L668I/Stop</b> | N444Y             |
| M376K/I           | N467K             |
| N19K              | <b>P322Q</b>      |
| N395K             | <b>P534Q</b>      |
| <b>P322Q</b>      | <b>Q595K</b>      |
| <b>P534Q</b>      | <b>Q71K</b>       |
| Q583K             | <b>R241K</b>      |
| <b>Q595K</b>      | <b>R438K</b>      |
| <b>Q71K</b>       | <b>R439K</b>      |



|     |   |            |            |
|-----|---|------------|------------|
| HA1 |   | R241K      | R671K      |
|     |   | R438K      | S415N/R    |
|     |   | R439K      | Stop727K   |
|     |   | R671K      | T20K       |
|     |   | S415N/R    | T414K      |
|     |   | Stop727K   | V443F      |
|     |   | T20K       | V625E/I    |
|     |   | T414K      | W133Stop   |
|     |   | V625I/E    | Y476N/Stop |
|     |   | W133Stop   |            |
|     |   | Y476N/Stop |            |
|     | 1 | A154E      | E183K      |
|     |   | D100E      | E184K      |
|     |   | D185E      | N165K      |
|     |   | E183K      | N303K      |
|     |   | E184K      | T47K       |
|     |   | E86K       |            |
|     |   | G218V      |            |
|     |   | G258E/R    |            |
|     |   | K344Stop   |            |
|     |   | L343Stop   |            |
|     |   | N303K      |            |
|     |   | P171Q      |            |
|     |   | P269R      |            |
|     |   | P31Q       |            |
|     |   | Q186K      |            |
|     |   | R101K      |            |
|     |   | S148N/R    |            |
|     |   | T102K      |            |
|     |   | T147N      |            |
|     |   | T221S      |            |
|     |   | T257K      |            |
|     |   | T259K      |            |
|     |   | T47K       |            |
|     | 2 | D100E      | D100E      |
|     |   | D163E      | D163E      |
|     |   | E183K      | D185E/N    |
|     |   | E184K      | E183K      |
|     |   | E232K      | E184K      |
|     |   | E235K      | E232K      |
|     |   | N164K      | E235K      |
|     |   | N165K      | N164K      |
|     |   | N303K      | N165K      |
|     |   | P36Q       | N303K      |
|     |   | Q233K      | Q186K      |
|     |   | Q263K      | Q233K      |
|     |   | R101K      | Q263K      |
|     |   | T102K      | R101K      |
|     |   | T234K      | S148R      |

|  |   |                |                |
|--|---|----------------|----------------|
|  |   | <b>T37K</b>    | <b>T102K</b>   |
|  |   | <b>T47K</b>    | <b>T37K</b>    |
|  | 3 |                | <b>T47K</b>    |
|  |   | <b>D100E</b>   | A42E           |
|  |   | <b>D163E</b>   | <b>D100E</b>   |
|  |   | <b>E183K</b>   | <b>D163E</b>   |
|  |   | <b>E184K</b>   | D185E/N        |
|  |   | <b>E232K</b>   | <b>E183K</b>   |
|  |   | <b>E235K</b>   | <b>E184K</b>   |
|  |   | I7K            | <b>E232K</b>   |
|  |   | <b>N164K</b>   | <b>E235K</b>   |
|  |   | <b>N165K</b>   | <b>N164K</b>   |
|  |   | <b>Q186K</b>   | <b>N165K</b>   |
|  |   | <b>Q233K</b>   | P36T/Q         |
|  |   | Q263K          | <b>Q186K</b>   |
|  |   | <b>R101K</b>   | <b>Q233K</b>   |
|  |   | <b>T102K</b>   | <b>R101K</b>   |
|  |   | <b>T37K</b>    | <b>T102K</b>   |
|  |   | <b>T47K</b>    | T234K          |
|  |   |                | <b>T37K</b>    |
|  |   |                | <b>T47K</b>    |
|  | 1 | C219F          | H142Q          |
|  |   | E105K          | <b>I107K</b>   |
|  |   | E43K           | <b>I108K</b>   |
|  |   | E82K           | <b>I48K</b>    |
|  |   | E97K           | <b>T49K</b>    |
|  |   | G106E/R        | <b>V217F</b>   |
|  |   | G225E          |                |
|  |   | <b>I107K</b>   |                |
|  |   | <b>I108K</b>   |                |
|  |   | I208F          |                |
|  |   | <b>I48K</b>    |                |
|  |   | I96K           |                |
|  |   | M211L          |                |
|  |   | N46K           |                |
|  |   | Q42K           |                |
|  |   | Q95K           |                |
|  |   | S163F          |                |
|  |   | S196Y          |                |
|  |   | S220Y          |                |
|  |   | <b>T49K</b>    |                |
|  |   | V131I          |                |
|  |   | V200E          |                |
|  |   | V209F          |                |
|  |   | <b>V217F</b>   |                |
|  |   | V60E/I         |                |
|  |   | Y210F          |                |
|  |   | <b>D215E/N</b> | <b>D215E/N</b> |
|  |   | <b>E43K</b>    | <b>E43K</b>    |

|     |   |         |         |
|-----|---|---------|---------|
| HA2 | 2 | E97K    | E97K    |
|     |   | G106E/R | G106E/R |
|     |   | G225E   | H142N/Q |
|     |   | H142N/Q | I107K   |
|     |   | I107K   | I108K   |
|     |   | I108K   | I208F   |
|     |   | I48K    | I48K    |
|     |   | I96K    | I96K    |
|     |   | M211L   | N46K    |
|     |   | N46K    | Q42K    |
|     |   | Q42K    | Q95K    |
|     |   | Q95K    | T49K    |
|     |   | T49K    | V200E   |
|     |   | V131I   | V217F   |
|     |   | V200E   | V60E/I  |
|     |   | V217F   |         |
|     |   | Y210F   |         |
|     |   | D215E/N | D215E/N |
|     |   | E43K    | E43K    |
|     |   | E97K    | E97K    |
|     |   | G106E/R | G106E/R |
|     |   | H142N/Q | G225E   |
|     |   | I107K   | H142N/Q |
|     |   | I108K   | I107K   |
|     |   | I48K    | I108K   |
|     |   | I96K    | I208F   |
|     |   | N46K    | I48K    |
|     |   | Q42K    | I96K    |
|     |   | Q95K    | M211L   |
|     |   | T49K    | N46K    |
|     |   | V131I   | Q42K    |
|     |   | V200E   | Q95K    |
|     |   | V209F   | T49K    |
|     |   | V217F   | V209F   |
|     |   | V60E/I  | V217F   |
|     |   |         | Y210F   |
|     |   | A366E   | D161E   |
|     |   | D566H   | E140K   |
|     |   | E104K   | E278K   |
|     |   | E140K   | E88K    |
|     |   | E74K    | I75K    |
|     |   | E88D    | N43K    |
|     |   | G193E   | T244N   |
|     |   | G219E   | L592V   |
|     |   | G246E   |         |
|     |   | G259E   |         |
|     |   | I271N   |         |
|     |   | I565K   |         |
|     |   | I75K    |         |

|    |   |                   |                   |
|----|---|-------------------|-------------------|
| NP | 1 | L194Q             |                   |
|    |   | L558H             |                   |
|    |   | M94L              |                   |
|    |   | N499K             |                   |
|    |   | N563K             |                   |
|    |   | P326H             |                   |
|    |   | P72T/Q            |                   |
|    |   | Q92K              |                   |
|    |   | R105K             |                   |
|    |   | R236Stop          |                   |
|    |   | R325M             |                   |
|    |   | R373K             |                   |
|    |   | R482K             |                   |
|    |   | R483K             |                   |
|    |   | S212Stop          |                   |
|    |   | S330N/R           |                   |
|    |   | S42R              |                   |
|    |   | S562T             |                   |
|    |   | Stop561K          |                   |
|    |   | T122S             |                   |
|    |   | T73K              |                   |
|    |   | V138F             |                   |
|    |   | V328E             |                   |
|    |   | V355D             |                   |
|    |   | V481I/E           |                   |
|    |   | Y560N/Stop        |                   |
|    | 2 | <b>D161N/E</b>    | S42A              |
|    |   | <b>D380E</b>      | <b>N43K</b>       |
|    |   | <b>E278K</b>      | <b>E74K</b>       |
|    |   | <b>E74K</b>       | <b>I75K</b>       |
|    |   | <b>E88K</b>       | <b>E88K</b>       |
|    |   | <b>G219E</b>      | H147Q             |
|    |   | <b>I75K</b>       | <b>N148K</b>      |
|    |   | <b>L194Q</b>      | <b>D161N/E</b>    |
|    |   | <b>L372I/Stop</b> | R170K             |
|    |   | L414I/Stop        | E176K             |
|    |   | <b>N148K</b>      | T180K             |
|    |   | <b>N286K</b>      | <b>L194Q</b>      |
|    |   | <b>N43K</b>       | <b>G219E</b>      |
|    |   | R105K             | <b>E278K</b>      |
|    |   | R304K             | <b>N286K</b>      |
|    |   | <b>R373K</b>      | <b>S303R</b>      |
|    |   | <b>R482K</b>      | <b>L372I/Stop</b> |
|    |   | <b>R483K</b>      | <b>R373K</b>      |
|    |   | <b>S303R</b>      | <b>D380E</b>      |
|    |   | S42R              | <b>R482K</b>      |
|    |   | Y560N             | <b>R483K</b>      |
|    |   |                   | V496D             |
|    |   | Y560N/Stop        |                   |

|   |  |                   |                   |
|---|--|-------------------|-------------------|
|   |  |                   | Stop561K          |
|   |  |                   | S562R             |
|   |  |                   | N563K             |
|   |  |                   |                   |
| 3 |  | D15E              | S42A              |
|   |  | <b>D161N/E</b>    | <b>N43K</b>       |
|   |  | <b>D380E</b>      | <b>E74K</b>       |
|   |  | <b>E143K</b>      | <b>I75K</b>       |
|   |  | <b>E144K</b>      | <b>E88K</b>       |
|   |  | <b>E278K</b>      | R105K             |
|   |  | <b>E74K</b>       | <b>E143K</b>      |
|   |  | <b>E88K</b>       | <b>E144K</b>      |
|   |  | <b>G219E</b>      | H147Q             |
|   |  | I169K             | <b>N148K</b>      |
|   |  | <b>I75K</b>       | <b>D161N/E</b>    |
|   |  | <b>L194Q</b>      | <b>R170K</b>      |
|   |  | L403Stop          | T180K             |
|   |  | <b>L414I/Stop</b> | <b>L194Q</b>      |
|   |  | <b>N148K</b>      | <b>G219E</b>      |
|   |  | <b>N43K</b>       | R235K             |
|   |  | P72Q              | <b>E278K</b>      |
|   |  | R116K             | S303R             |
|   |  | <b>R170K</b>      | R304K             |
|   |  | R482K             | L372I/Stop        |
|   |  | R483K             | R373K             |
|   |  | S42R              | <b>D380E</b>      |
|   |  | <b>Stop561K</b>   | Q383K             |
|   |  | Y277Stop          | <b>L414I/Stop</b> |
|   |  | <b>Y560N/Stop</b> | <b>Y560N/Stop</b> |
|   |  |                   | <b>Stop561K</b>   |
|   |  |                   | N563K             |
|   |  | Y30N              | <b>T43K</b>       |
|   |  | L38Q              | <b>E44K</b>       |
|   |  | S41Stop           | <b>I45K</b>       |
|   |  | S42T              | <b>G108R/E</b>    |
|   |  | <b>T43K</b>       | <b>R147K</b>      |
|   |  | <b>E44K</b>       | <b>E148K</b>      |
|   |  | <b>I45K</b>       | D149N/E           |
|   |  | E105K             | <b>R150K</b>      |
|   |  | <b>G108R/E</b>    | <b>N151K</b>      |
|   |  | I115K             | <b>I204K</b>      |
|   |  | P124Q             | N219K             |
|   |  | G145V             | <b>E226K</b>      |
|   |  | <b>R147K</b>      | <b>I262K</b>      |
|   |  | <b>E148K</b>      | <b>I262K</b>      |
|   |  | <b>R150K</b>      | N284K             |
|   |  | <b>N151K</b>      | <b>I333K</b>      |
|   |  | K152N             |                   |
|   |  | P165Q             |                   |
|   |  | <b>I204K</b>      |                   |

|    |   |                |                |
|----|---|----------------|----------------|
| NA | 1 | T213R          |                |
|    |   | Y214N          |                |
|    |   | L222Q          |                |
|    |   | T224K          |                |
|    |   | Q225K          |                |
|    |   | <b>E226K</b>   |                |
|    |   | Y237F          |                |
|    |   | L238F          |                |
|    |   | I261K          |                |
|    |   | <b>I262K</b>   |                |
|    |   | P267S          |                |
|    |   | E272K          |                |
|    |   | E275K          |                |
|    |   | E276K          |                |
|    |   | <b>N284K</b>   |                |
|    |   | A298T/E        |                |
|    |   | L305Stop       |                |
|    |   | S332R          |                |
|    |   | <b>I333K</b>   |                |
|    |   | Q355K          |                |
|    |   | R356K          |                |
|    |   | R367Q          |                |
|    |   | T368K          |                |
|    |   | I372N          |                |
|    | 2 | Stop39K        | L38Q           |
|    |   | H42Q           | S42T/Stop      |
|    |   | N44Q           | T43K           |
|    |   | Stop46K        | E44K           |
|    |   | Y86F           | I45K           |
|    |   | P107T/Q        | L85F           |
|    |   | <b>G108R/E</b> | T106N          |
|    |   | <b>I114K</b>   | <b>G108R/E</b> |
|    |   | <b>I115K</b>   | <b>I114K</b>   |
|    |   | D194N/E        | <b>I115K</b>   |
|    |   | <b>R150K</b>   | D149N          |
|    |   | <b>N151K</b>   | <b>R150K</b>   |
|    |   | <b>I204K</b>   | <b>N151K</b>   |
|    |   | <b>N219K</b>   | <b>I204K</b>   |
|    |   | Y237F          | N219K          |
|    |   | <b>L238F</b>   | <b>Y237F</b>   |
|    |   | <b>I261K</b>   | <b>L238F</b>   |
|    |   | <b>I262K</b>   | <b>I261K</b>   |
|    |   | <b>E264K</b>   | <b>I262K</b>   |
|    |   | <b>N284K</b>   | <b>E264K</b>   |
|    |   | A298T/E        | N284K          |
|    |   | L305I/Stop     | A298T/E        |
|    |   | <b>I333K</b>   | L305T/Stop     |
|    |   | <b>R356K</b>   | <b>I333K</b>   |
|    |   | L372Q          | <b>R356K</b>   |

|           |          |                   |                   |
|-----------|----------|-------------------|-------------------|
|           |          | <b>I415K</b>      | <b>I415K</b>      |
|           |          | <b>D417N/E</b>    | <b>D417N/E</b>    |
|           | <b>3</b> | E418K             |                   |
|           |          | <b>L38Q</b>       | <b>L38Q</b>       |
|           |          | <b>S42T/Stop</b>  | <b>S42T/Stop</b>  |
|           |          | <b>T43K</b>       | <b>T43K</b>       |
|           |          | <b>E44K</b>       | <b>E44K</b>       |
|           |          | <b>I45K</b>       | <b>I45K</b>       |
|           |          | <b>L85F</b>       | <b>L85F</b>       |
|           |          | <b>G108R/E</b>    | <b>G108R/E</b>    |
|           |          | <b>I114K</b>      | <b>I114K</b>      |
|           |          | <b>I115K</b>      | <b>I115K</b>      |
|           |          | <b>E148K</b>      | <b>E148K</b>      |
|           |          | <b>D149E</b>      | <b>D149E</b>      |
|           |          | <b>R150K</b>      | <b>R150K</b>      |
|           |          | <b>N151K</b>      | <b>N151K</b>      |
|           |          | <b>I204K</b>      | <b>I204K</b>      |
|           |          | <b>E226K</b>      | <b>E226K</b>      |
|           |          | <b>Y237F</b>      | <b>Y237F</b>      |
|           |          | <b>I261K</b>      | <b>I261K</b>      |
|           |          | <b>I262K</b>      | <b>I262K</b>      |
|           |          | <b>E264K</b>      | <b>E264K</b>      |
|           |          | <b>N284K</b>      | <b>N284K</b>      |
|           |          | <b>L305I/Stop</b> | <b>L305I/Stop</b> |
|           |          | <b>I333K</b>      | <b>I333K</b>      |
| <b>NB</b> | <b>1</b> | I32K              | <b>N45K</b>       |
|           |          | F43L              | <b>R46K</b>       |
|           |          | I44N              | <b>N47K</b>       |
|           |          | <b>N45K</b>       |                   |
|           |          | <b>R46K</b>       |                   |
|           |          | <b>N47K</b>       |                   |
|           | <b>2</b> | <b>I44N</b>       | <b>I44N</b>       |
|           |          | <b>N45K</b>       | <b>N45K</b>       |
|           |          | <b>R46K</b>       | <b>R46K</b>       |
|           |          | <b>N47K</b>       | <b>N47K</b>       |
|           |          | <b>I88F</b>       | <b>I88F</b>       |
|           | <b>3</b> | <b>I44N</b>       | <b>I44N</b>       |
|           |          | <b>N45K</b>       | <b>N45K</b>       |
|           |          | <b>R46K</b>       | <b>R46K</b>       |
|           |          | <b>N47K</b>       | <b>N47K</b>       |
|           |          | <b>I88F</b>       | <b>I88F</b>       |
|           |          | E196K             | E23K              |
|           |          | E36K              | <b>G191E</b>      |
|           |          | <b>G191E</b>      | <b>Q154K</b>      |
|           |          | G193V             | <b>T91K</b>       |
|           |          | I46K              |                   |
|           |          | I55K              |                   |
|           |          | K68I/Stop         |                   |
|           |          | L67F/Stop         |                   |

|   |   |                  |                  |
|---|---|------------------|------------------|
| M | 1 | M177L            |                  |
|   |   | N48K             |                  |
|   |   | <b>Q154K</b>     |                  |
|   |   | Q219K            |                  |
|   |   | Q56K             |                  |
|   |   | R74K             |                  |
|   |   | S218R            |                  |
|   |   | T88K             |                  |
|   |   | <b>T91K</b>      |                  |
|   | 2 | <b>A22E</b>      | <b>A22E</b>      |
|   |   | <b>A25E/T</b>    | <b>A25E/T</b>    |
|   |   | <b>E23K</b>      | D71Y             |
|   |   | <b>E26K</b>      | <b>E23K</b>      |
|   |   | <b>I46K</b>      | <b>E26K</b>      |
|   |   | <b>L24I/Q</b>    | G191E            |
|   |   | <b>N48K</b>      | <b>I46K</b>      |
|   |   | <b>Q154K</b>     | K68I/Stop        |
|   |   | <b>Q219K</b>     | <b>L24I/Q</b>    |
|   |   | R74K             | L67F             |
|   |   | <b>S218R</b>     | <b>N48K</b>      |
|   |   | <b>T88K</b>      | <b>Q154K</b>     |
|   |   | <b>T91K</b>      | <b>Q219K</b>     |
|   |   |                  | <b>S218R</b>     |
|   |   |                  | <b>T88K</b>      |
|   |   |                  | <b>T91K</b>      |
|   | 3 | <b>A22E</b>      | <b>A22E</b>      |
|   |   | <b>A25E/T</b>    | <b>A25E/T</b>    |
|   |   | <b>E23K</b>      | A90E             |
|   |   | <b>E26K</b>      | D71Y             |
|   |   | <b>G191E</b>     | <b>E23K</b>      |
|   |   | <b>I46K</b>      | <b>E26K</b>      |
|   |   | <b>K68I/Stop</b> | <b>G191E</b>     |
|   |   | L24Q             | <b>I46K</b>      |
|   |   | <b>L67F</b>      | <b>K68I/Stop</b> |
|   |   | <b>N48K</b>      | L24I/Q           |
|   |   | <b>Q154K</b>     | <b>L67F</b>      |
|   |   | <b>Q219K</b>     | <b>N48K</b>      |
|   |   | <b>R101K</b>     | <b>Q154K</b>     |
|   |   | R74K             | <b>Q219K</b>     |
|   |   | <b>S218R</b>     | <b>R101K</b>     |
|   |   | <b>T88K</b>      | <b>S218R</b>     |
|   |   | <b>T91K</b>      | <b>T88K</b>      |
|   |   |                  | <b>T91K</b>      |
|   |   | E104Stop         | D47E             |
|   |   | E63K             | E106K            |
|   |   | E79D             | E107K            |
|   |   | E93D             | L15Stop          |
|   |   | H19N             | <b>T48K</b>      |
|   |   | H84Q             |                  |



|    |   |                |                |
|----|---|----------------|----------------|
| MB | 1 | I14F           |                |
|    |   | I49K           |                |
|    |   | I95K           |                |
|    |   | I96K           |                |
|    |   | L103F          |                |
|    |   | M37I           |                |
|    |   | Q61K           |                |
|    |   | S91F           |                |
|    |   | <b>T48K</b>    |                |
|    |   | T69K           |                |
|    |   | Y60Stop        |                |
|    | 2 | E63K           | C11F           |
|    |   | <b>I49K</b>    | D47E           |
|    |   | L10F           | E106K          |
|    |   | <b>M37I</b>    | E107K          |
|    |   | <b>Q61K</b>    | <b>I49K</b>    |
|    |   | R106K          | L114Stop       |
|    |   | R107K          | L15Stop        |
|    |   | <b>T48K</b>    | <b>M37I</b>    |
|    |   | <b>Y60Stop</b> | <b>Q61K</b>    |
|    |   |                | <b>T48K</b>    |
|    |   |                | <b>Y60Stop</b> |
|    | 3 | <b>D47E</b>    | <b>D47E</b>    |
|    |   | <b>E63K</b>    | E106K          |
|    |   | L15Stop        | E107K          |
|    |   | <b>M37I</b>    | <b>E63K</b>    |
|    |   | N48K           | I49K           |
|    |   | <b>Q61K</b>    | L110Stop       |
|    |   | R106K          | <b>M37I</b>    |
|    |   | R107K          | <b>Q61K</b>    |
|    |   | <b>T48K</b>    | <b>T48K</b>    |
|    |   | <b>Y60Stop</b> | <b>Y60Stop</b> |
|    | 1 | A257E/G        | L51Q           |
|    |   | A258S          | N151K          |
|    |   | A95S           | <b>N152K</b>   |
|    |   | E144K          | R53K           |
|    |   | E168K          | R58K           |
|    |   | E245D          | <b>V163I/E</b> |
|    |   | E249D          | E259K          |
|    |   | E32K           |                |
|    |   | F100V          |                |
|    |   | I159K          |                |
|    |   | I175K          |                |
|    |   | I255L          |                |
|    |   | K253N          |                |
|    |   | L185F          |                |
|    |   | <b>N152K</b>   |                |
|    |   | P142Q          |                |
|    |   | P254Q          |                |

|     |   |                |                |
|-----|---|----------------|----------------|
| NS1 |   | Q157K          |                |
|     |   | R217T          |                |
|     |   | S252Stop       |                |
|     |   | T174K          |                |
|     |   | T260S          |                |
|     |   | <b>V163I/E</b> |                |
|     |   | V262G          |                |
|     |   | V82I/E         |                |
|     |   | W36R/C         |                |
|     |   | Y116Stop       |                |
|     |   | Y121C          |                |
|     |   | Y31Stop        |                |
|     | 2 | E168K          | E259K          |
|     |   | <b>I159K</b>   | <b>I159K</b>   |
|     |   | <b>I175K</b>   | <b>I175K</b>   |
|     |   | <b>I59K</b>    | <b>I59K</b>    |
|     |   | <b>L51I/Q</b>  | <b>L51I/Q</b>  |
|     |   | <b>N151K</b>   | <b>N151K</b>   |
|     |   | <b>N152K</b>   | <b>N152K</b>   |
|     |   | <b>R53K</b>    | <b>R53K</b>    |
|     |   | <b>R58K</b>    | <b>R58K</b>    |
|     |   | <b>S57Stop</b> | <b>S57Stop</b> |
|     |   | S69N/R         | S69R           |
|     | 3 | E168K          | E259K          |
|     |   | <b>I159K</b>   | <b>I159K</b>   |
|     |   | <b>I175K</b>   | <b>I175K</b>   |
|     |   | <b>I59K</b>    | <b>I59K</b>    |
|     |   | <b>L51I/Q</b>  | <b>L51I/Q</b>  |
|     |   | <b>N151K</b>   | <b>N151K</b>   |
|     |   | <b>N152K</b>   | <b>N152K</b>   |
|     |   | Q214K          | <b>R53K</b>    |
|     |   | <b>R53K</b>    | <b>R58K</b>    |
|     |   | <b>R58K</b>    | <b>S57Stop</b> |
|     |   | <b>S57Stop</b> | <b>S69N/R</b>  |
|     |   | <b>S69N/R</b>  | V163I          |
|     |   | V163I/E        |                |
| NS1 | 1 | D78Y           | D79E           |
|     |   | D79E/N         | <b>I93K</b>    |
|     |   | D96Y           |                |
|     |   | F37Y           |                |
|     |   | <b>I93K</b>    |                |
|     |   | K31T           |                |
|     |   | K41N           |                |
|     |   | L29Stop        |                |
|     |   | L82F           |                |
|     |   | Q34L/K         |                |
|     |   | Q36H/K         |                |
|     |   | Q39K/E/H       |                |
|     |   | R76K           |                |

|  |   |              |             |
|--|---|--------------|-------------|
|  |   | S27I         |             |
|  |   | S35I         |             |
|  |   | V87E         |             |
|  |   | W44G         |             |
|  | 2 | <b>D79E</b>  | <b>D79E</b> |
|  |   | <b>E259K</b> | <b>I93K</b> |
|  |   | <b>I93K</b>  | <b>L72F</b> |
|  |   | <b>L73F</b>  | <b>L73F</b> |
|  |   | <b>Y71F</b>  | <b>Y71F</b> |
|  | 3 | <b>D79E</b>  | <b>D79E</b> |
|  |   |              | I93K        |

\* Bolded substitutions indicate common substitutions between WT and mutant virus

† N/A: Not applicable; No substitutions were observed in the viral protein after passage
